# Supplementary material for: Evolution and Epidemiology of Multidrug-Resistant Klebsiella pneumoniae in the United Kingdom and Ireland
Source: PubMed Central journal article supplement (PMC5358916; doi:10.1128/mbio.01976-16), 2017-02-21

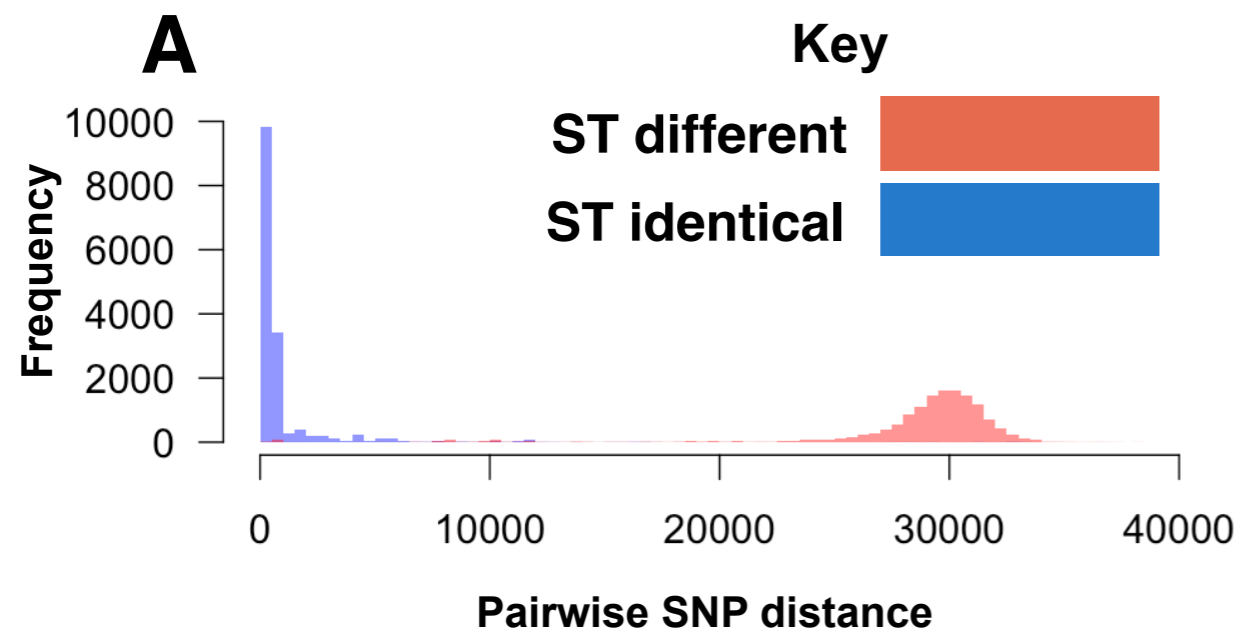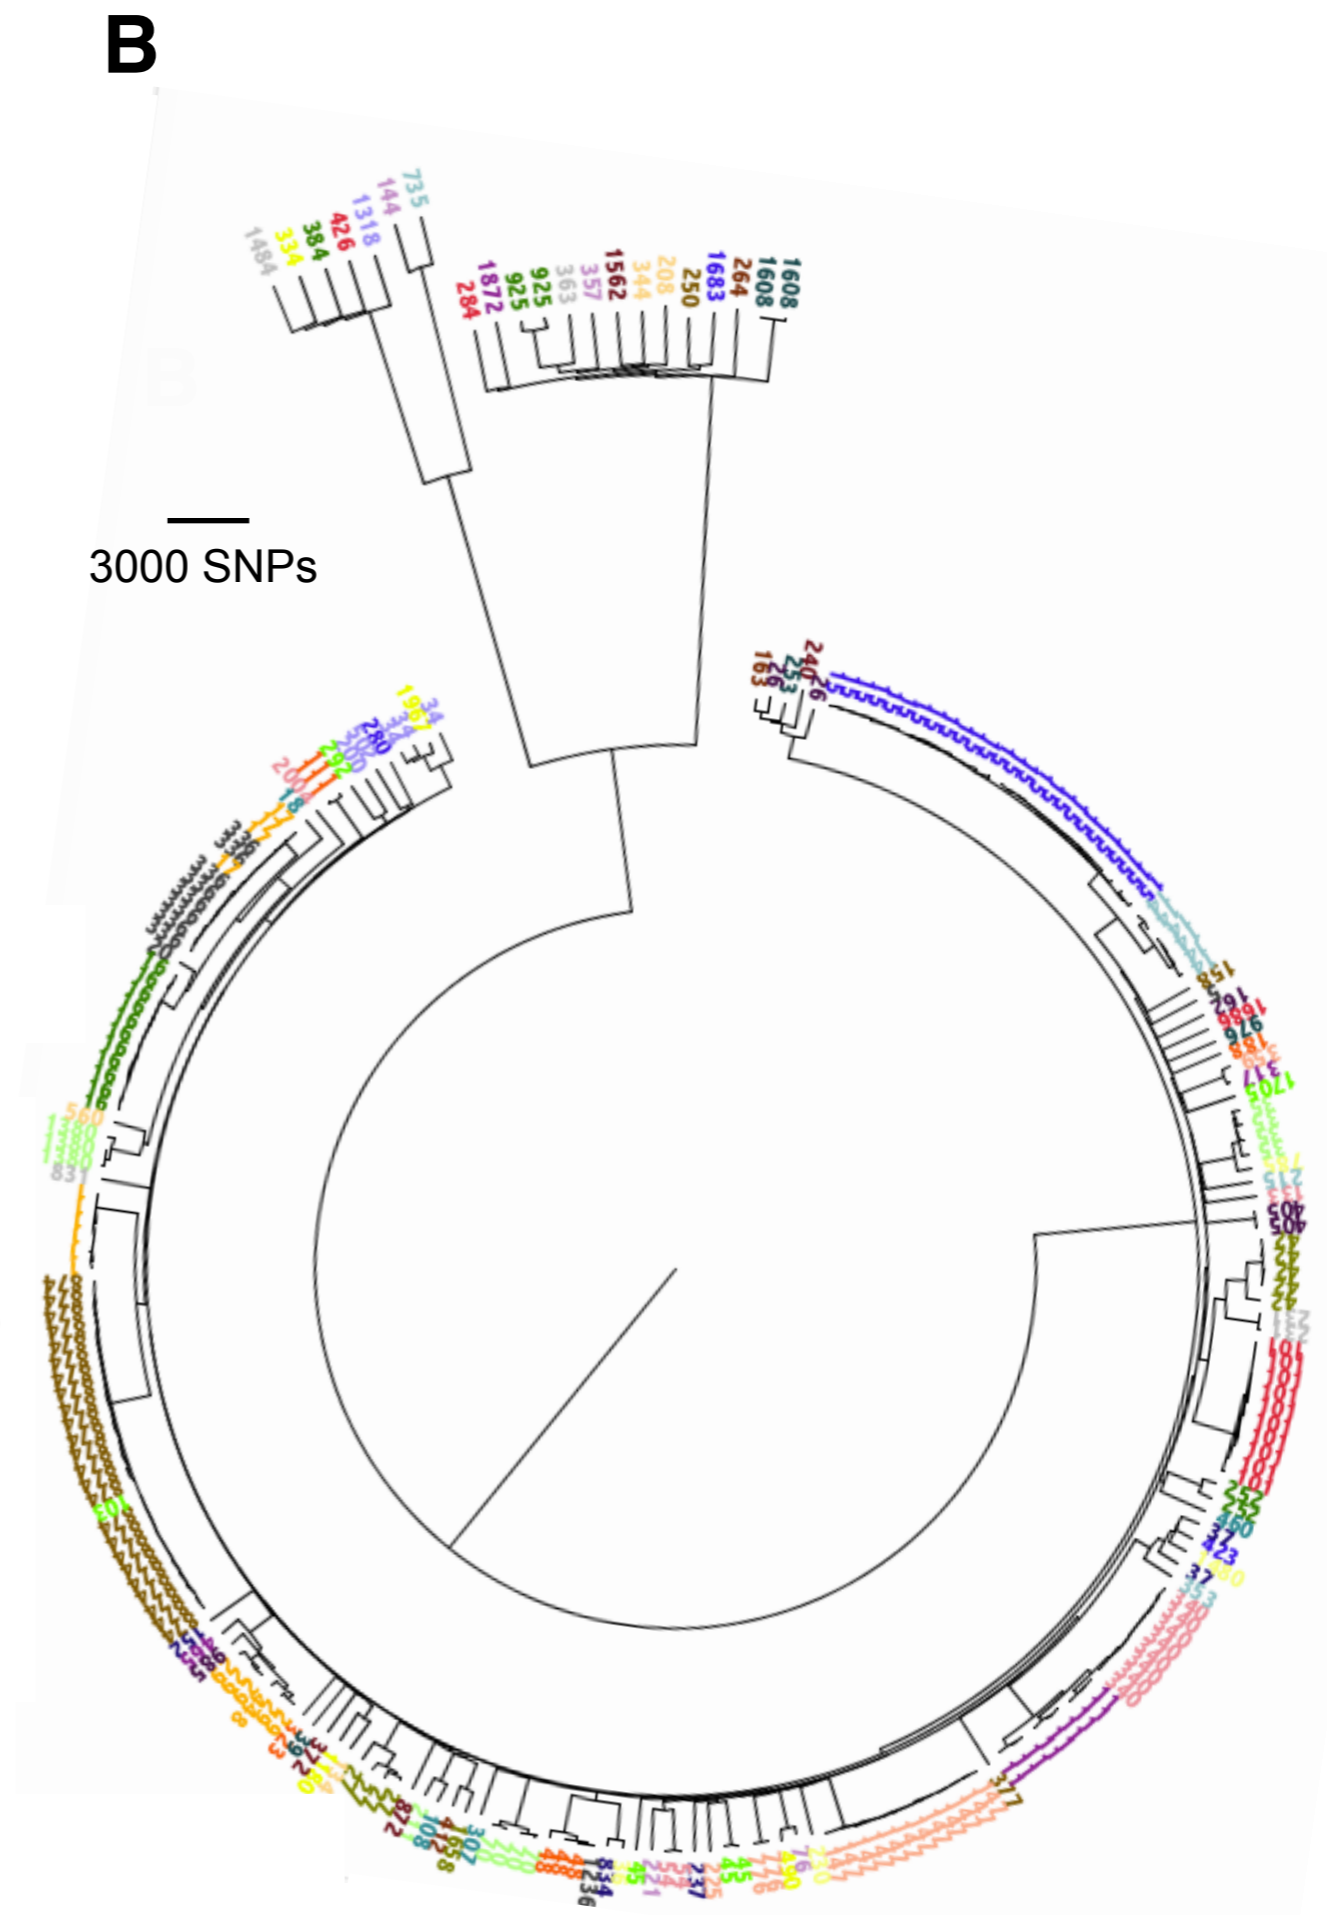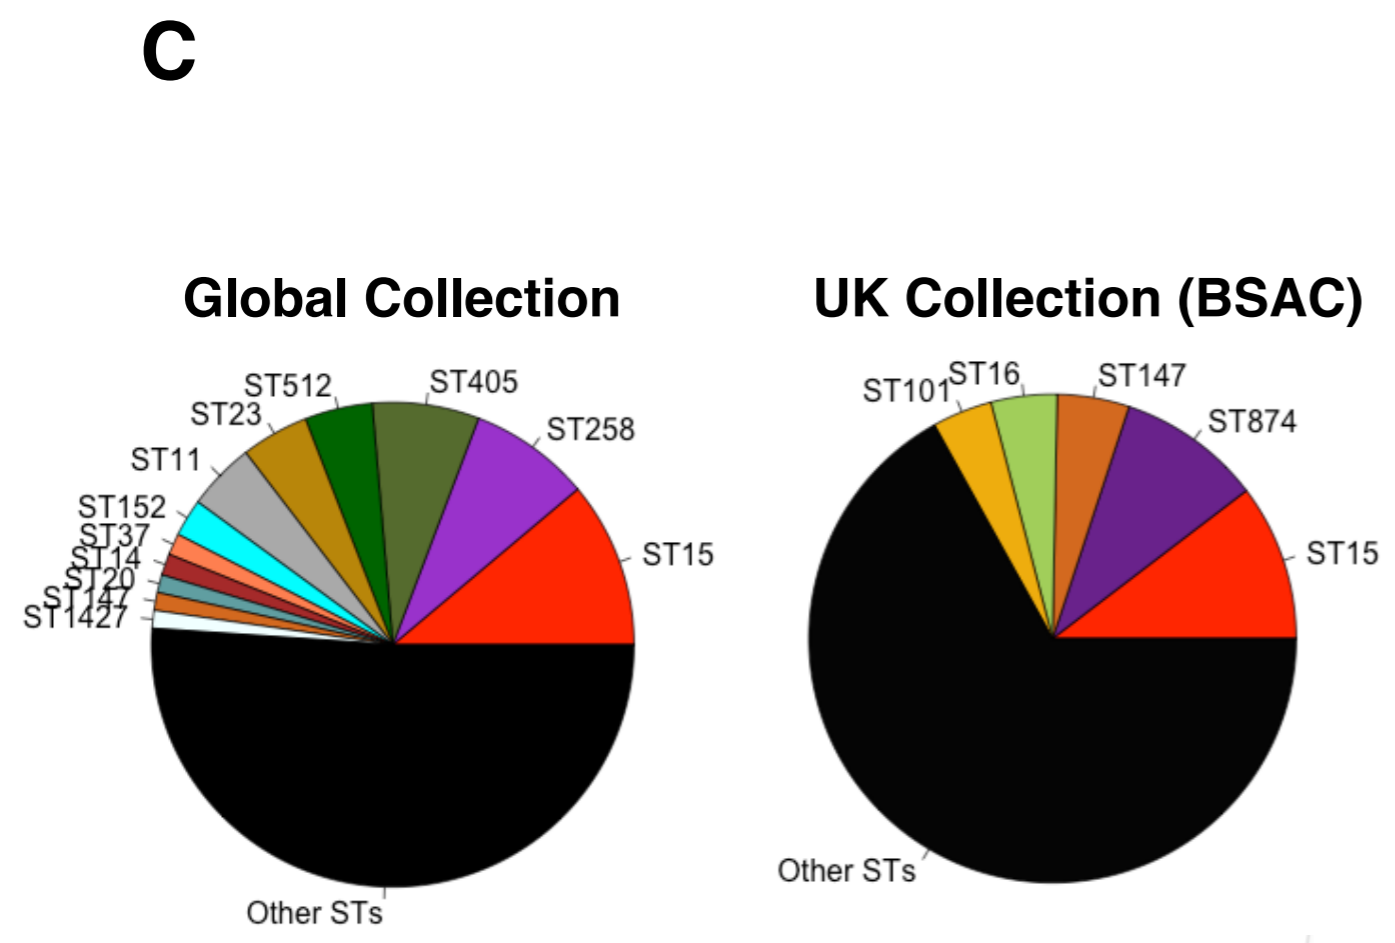

Supplement: mbo001173200sf1.pdf [file mbo001173200sf1.pdf]
