# Supplementary material for: Evolution and Epidemiology of Multidrug-Resistant Klebsiella pneumoniae in the United Kingdom and Ireland
Source: PubMed Central journal article supplement (PMC5358916; doi:10.1128/mbio.01976-16), 2017-02-21

*iutA* *wzi* *mirkD* *mirkC* *mirkF* *mirkA* *mirkB* *mirkJ* *mirkH* *mirkI* *kfuA* *kfuB* *kfuC* *fyuA* *irp1* *yotA* *yotE* *yotP* *yotQ* *yotS* *yotT* *yotU* *yotX* *irp2* *kvgs* *kvga* *kp1* *allA* *allB* *allC* *allD* *allR* *allS* *arcC* *tdra* *gcl* *glxK* *glxR* *hyi* *mceA* *mceB* *mceC* *mceD* *mceE* *mceJ* *ybbW* *ybbY*

**A**

**Key**  
 Present   
 Absent 

—  
**16000 SNPs**

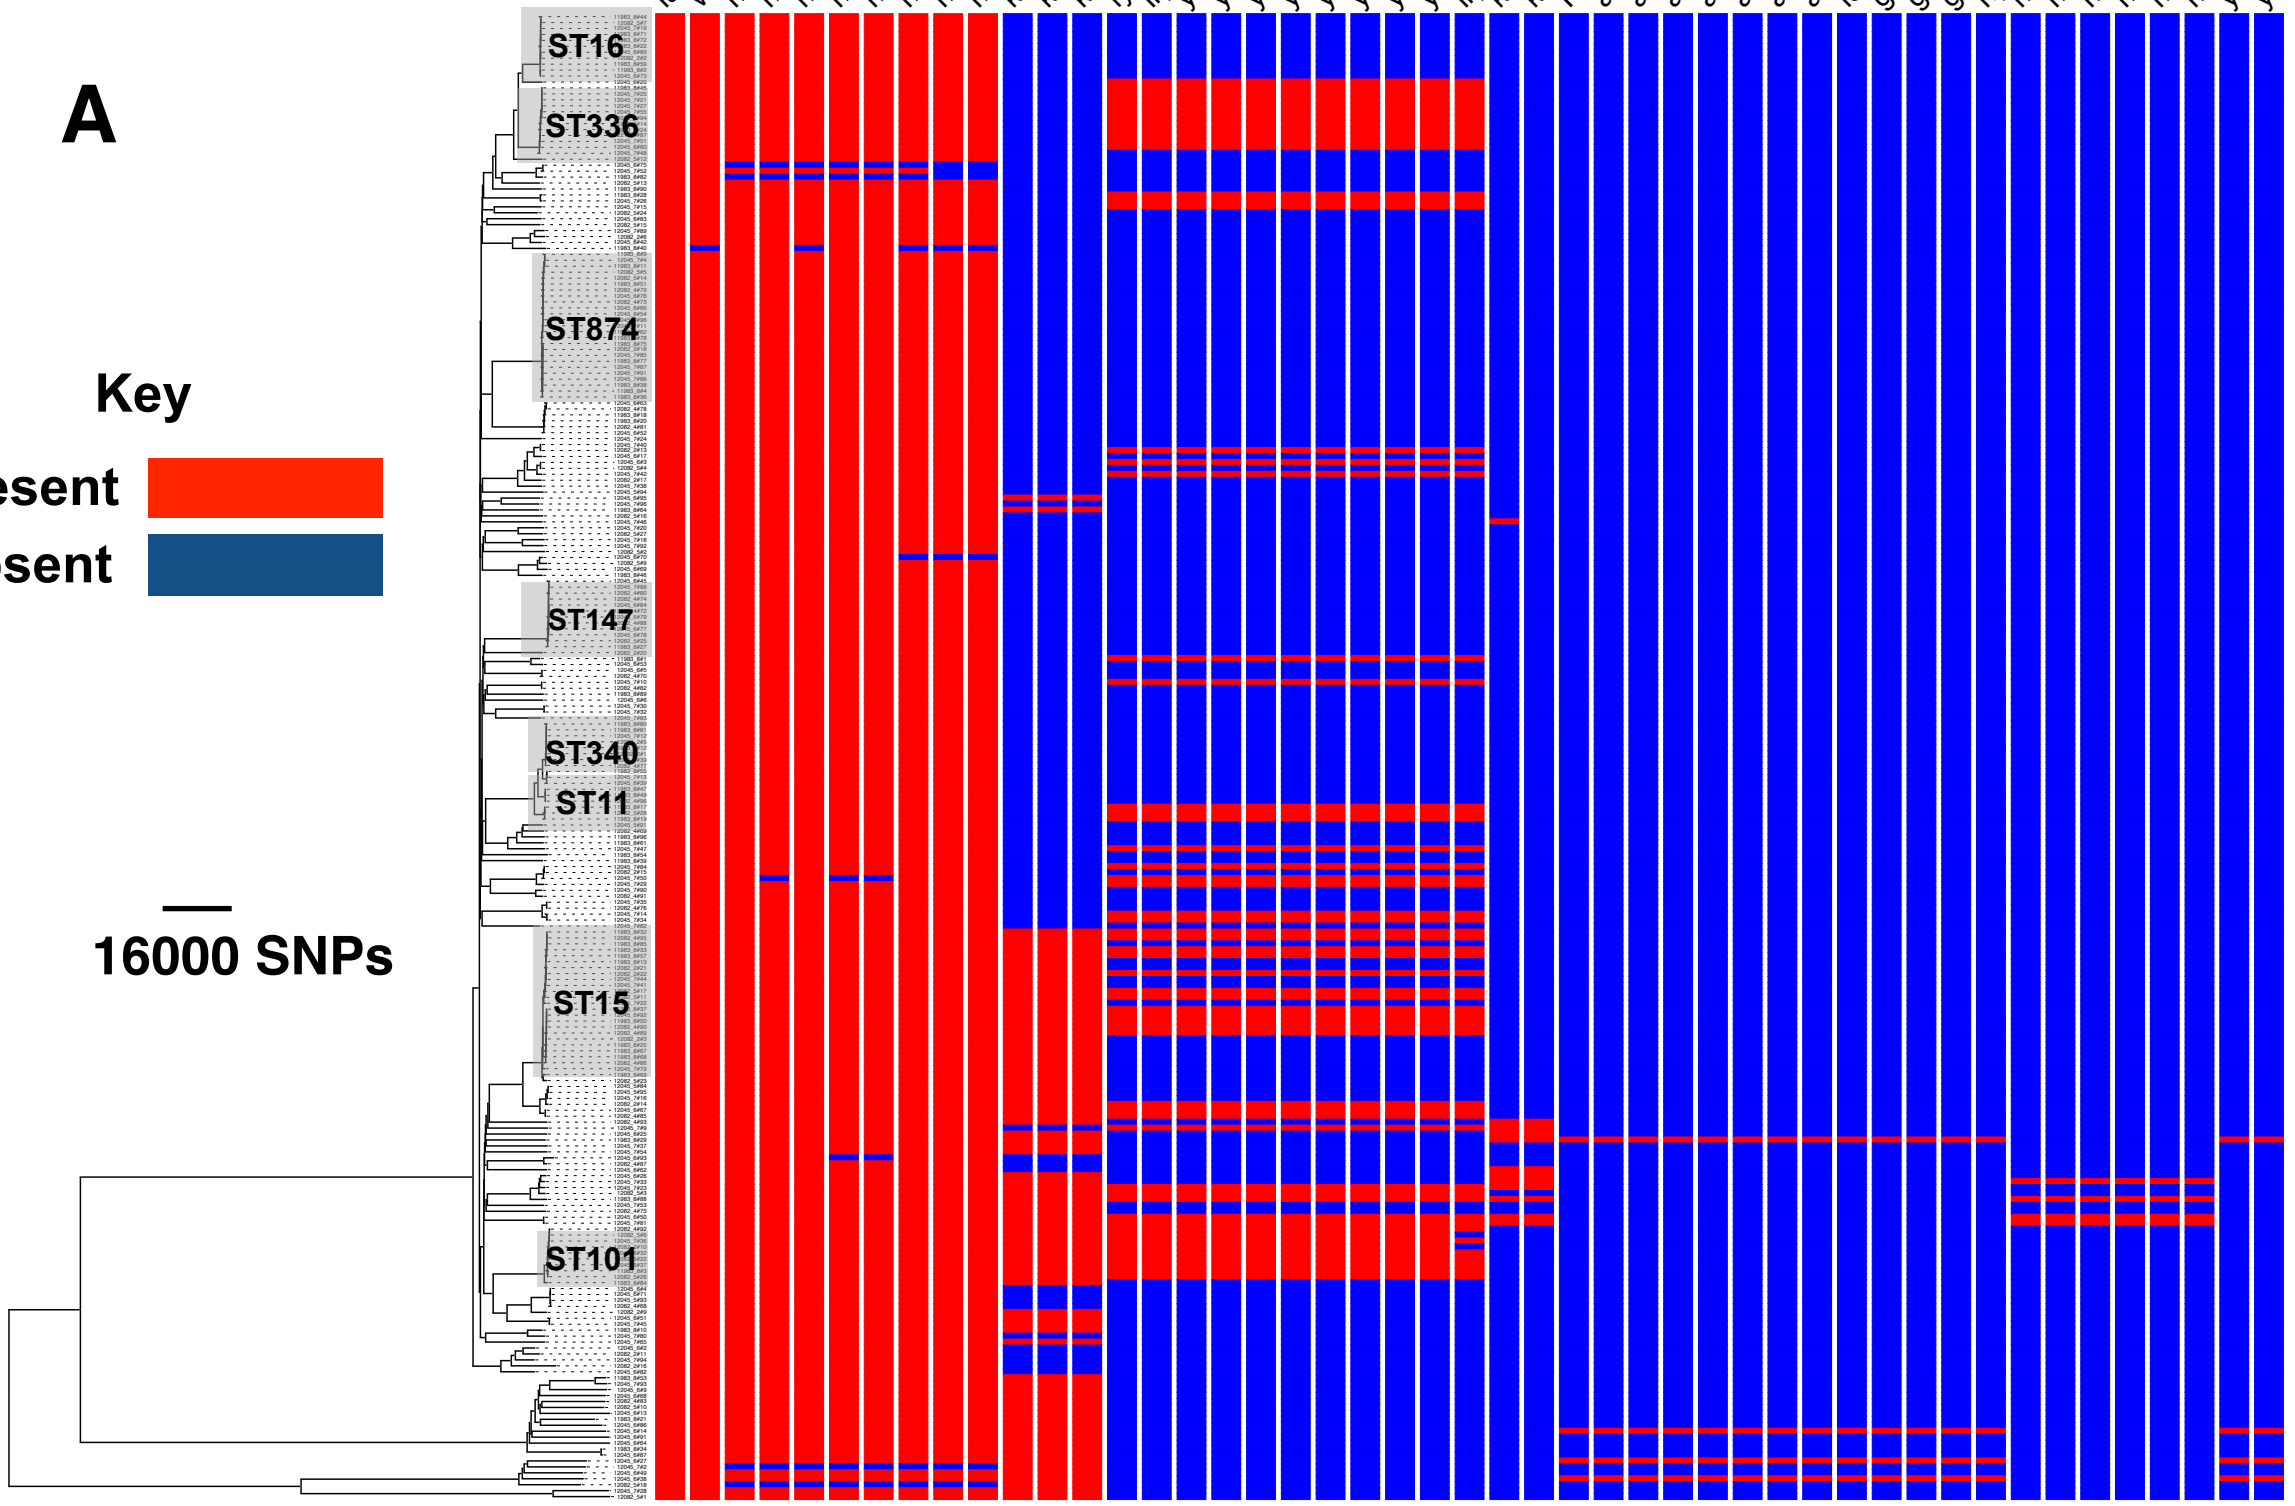

**B**

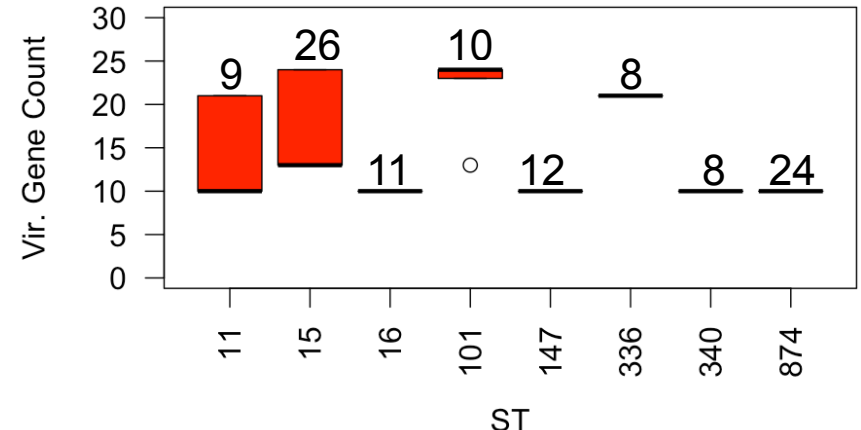

Supplement: mbo001173200sf3.pdf [file mbo001173200sf3.pdf]
